# Supplementary material for: Grapevine-Associated Lipid Signalling Is Specifically Activated in an Rpv3 Background in Response to an Aggressive P. viticola Pathovar
Source: MDPI journal article supplement (doi:10.3390/cells12030394), 2023-01-21
Supplement: s1 [file s1]

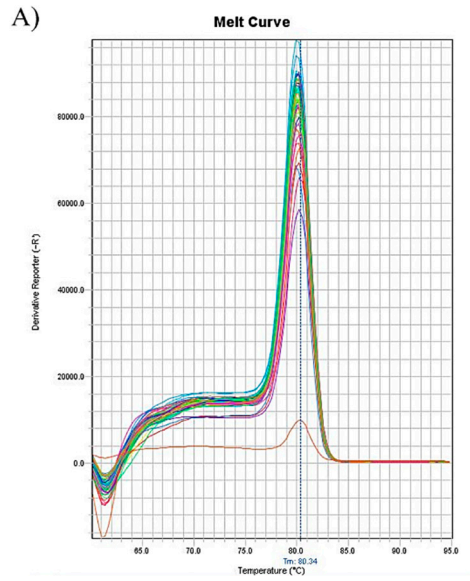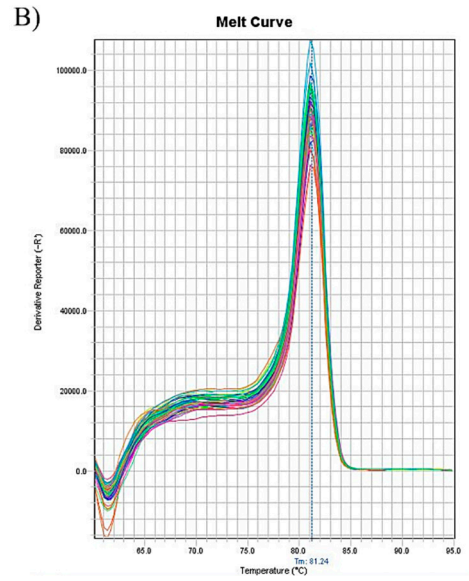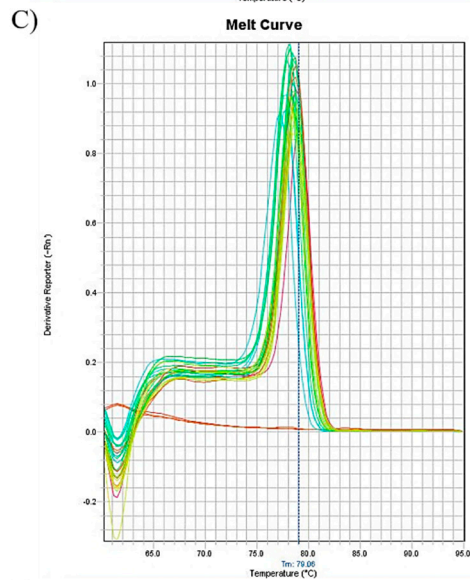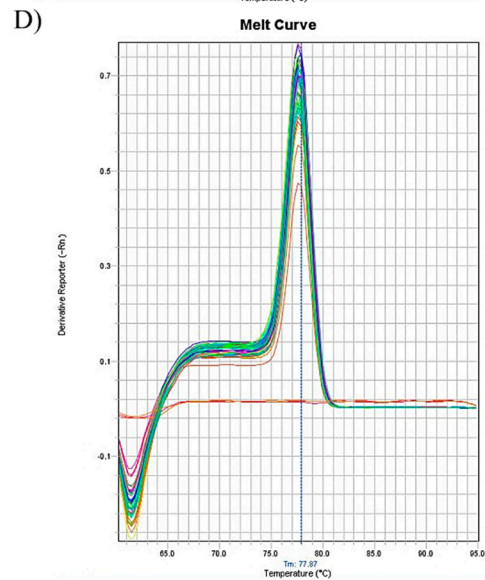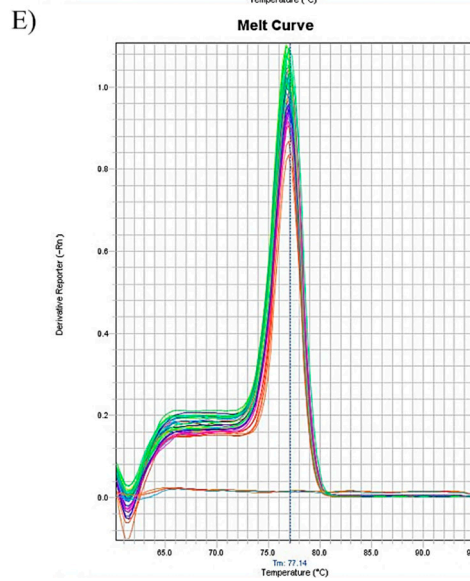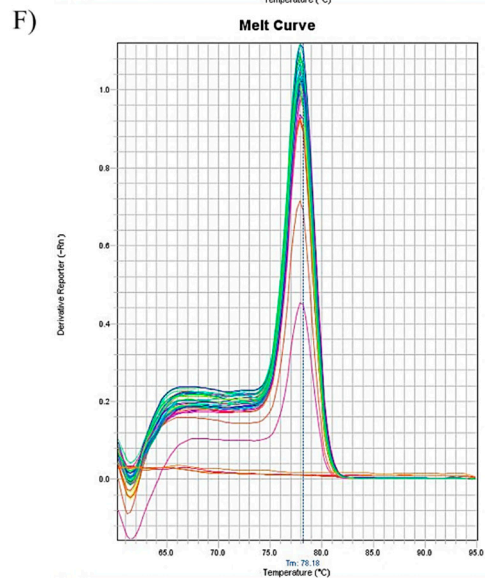

G)

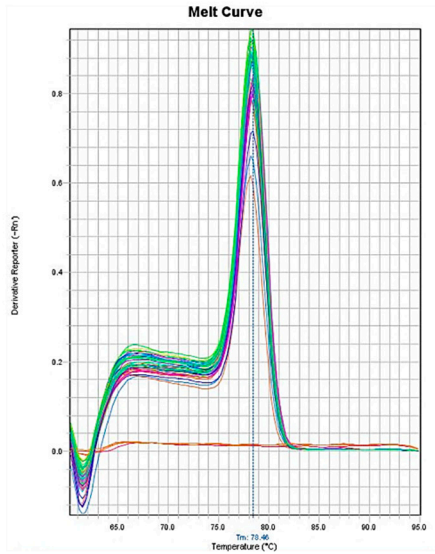

H)

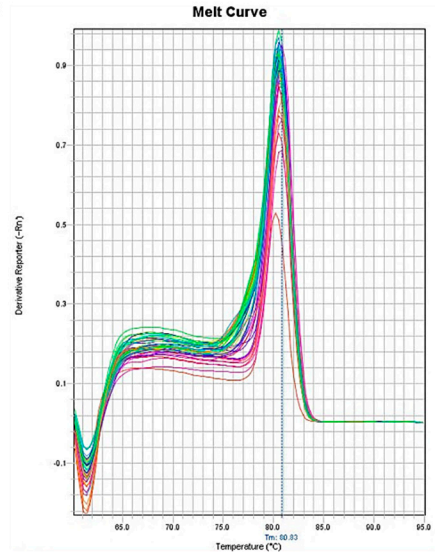

I)

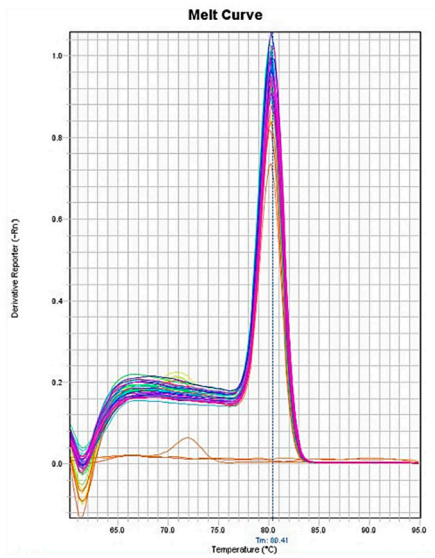

J)

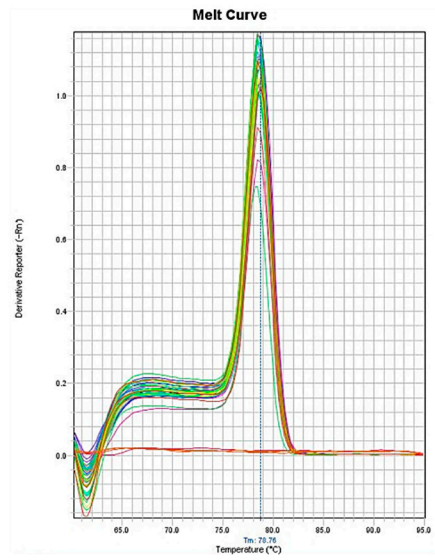

K)

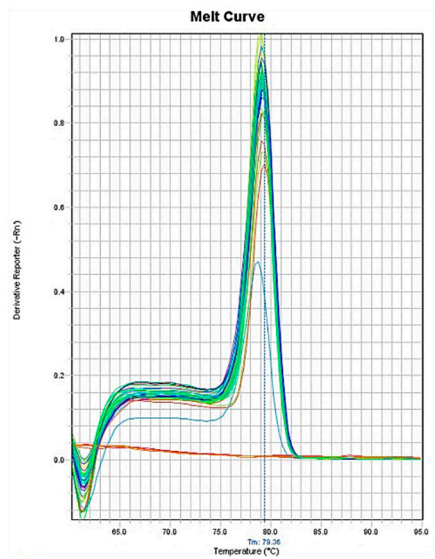

L)

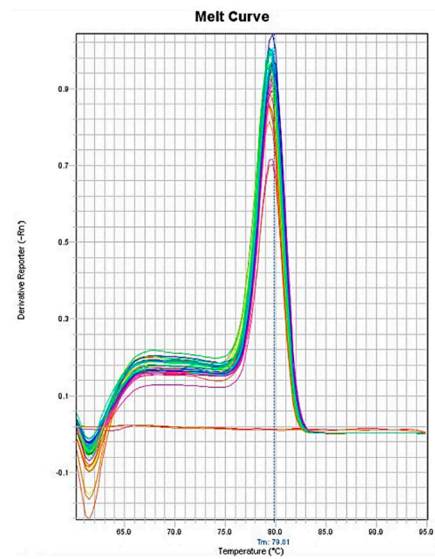

M)

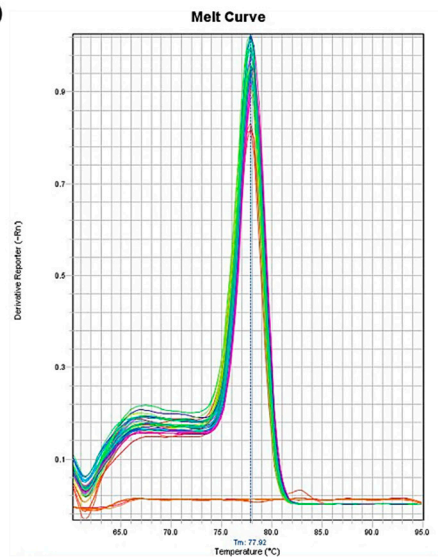

N)

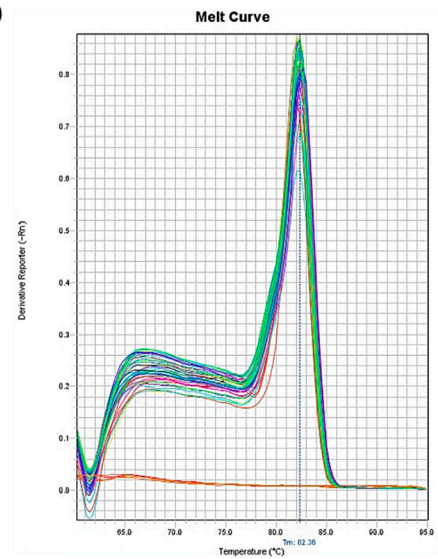

**Figure S1 - Melting curves of targeted genes.** A) *EF1 $\alpha$* ; B) *UBQ*; C) *VviPI-PLC1*; D) *VviPI-PLC2*; E) *VviPI-PLC7*; F) *VviNPC3*; G) *VviNPC4*; H) *VviPLD $\alpha$ 3*; I) *VviPLD $\beta$* ; J) *VviPLD $\zeta$* ; K) *VviFAD8*; L) *VviFAD2-1*; M) *VviSAD-1*; N) *VvisPLA<sub>2</sub>*.
